# Supplementary material for: Dynamic porous coordination polymer based on 2D stacked layers exhibiting high sorption selectivity for CO2
Source: Royal Society of Chemistry journal article supplement (doi:10.1039/c2dt12198k), 2012-01-01
Supplement: c2dt12198k.pdf [file c2dt12198k.pdf]

## **Electronic Supporting Information (ESI)**

### **Dynamic porous coordination polymer based on 2D stacked layers exhibiting high sorption selectivity for CO<sub>2</sub>**

**Bo Liu, Lei Hou, Yao-Yu Wang,\* Hui Miao, Li Bao and Qi-Zhen Shi**

Key Laboratory of Synthetic and Natural Functional Molecule Chemistry of the Ministry of Education, Shaanxi Key Laboratory of Physico-Inorganic Chemistry, College of Chemistry & Materials Science, Northwest University, Xi'an 710069 (P. R. China).

Email: [wyaoyu@nwu.edu.cn](mailto:wyaoyu@nwu.edu.cn), Tel: 86 29 88302604

## Table of Content

- 1. Figure. S1** IR spectrum for  $\{[\text{Ni}(\text{dcpv})(\text{bipy})_{0.5}(\text{H}_2\text{O})] \cdot 1.5\text{H}_2\text{O}\}$  (**1**)
- 2. Figure. S2** PXRD patterns for **1** obtained under different synthesis methods; a) simulated from the single crystal data; b) as-synthesized **1** via conventional solvothermal; c) as-synthesized **1** via conventional hydrothermal; d) as-synthesized **1** via rapid microwave method.
- 3. Figure. S3** The ball-and-stick drawing of the asymmetric unit in **1**, the hydrogen atoms and solvent molecules are omitted, and the atoms in the asymmetric unit are labeled. Symmetry codes: \*:  $1/2-x, 1/2-y, -z$ .
- 4. Figure. S4** View of the 1D chain structure linked by  $\text{Ni}^{2+}$  centers and  $\text{dcpv}^{2-}$  ligands in **1** along the crystallographic *c*-axis.
- 5. Figure. S5** View of the 2D layer of **1**: a) along the crystallographic *a*-axis; b) along the crystallographic *b*-axis; c) along the crystallographic (101)-axis.
- 6. Figure. S6** View of the 2D stacked layers of **1**: a) along the crystallographic *a*-axis; b) along the crystallographic *b*-axis.
- 7. Figure. S7** TGA plots of the as-synthesized and desolvated samples of **1**.
- 8. Figure. S8** PXRD patterns for **1** in different state; a) simulated from the single crystal data; b) synthesized powder samples; c) dehydrated samples **1a**; d) dehydrated samples **1b**; e) dehydrated samples **1c**; f) dehydrated samples **1d**; g) rehydrated samples.
- 9. Figure. S9** Sorption isotherms of  $\text{CO}_2$  measured at 195 K (a) and  $\text{N}_2$  measured at 77 K (b).
- 10. Figure. S10** Sorption isotherms of  $\text{CO}_2$  measured at 273 K and 293 K.
- 11. Figure. S11** Sorption isotherms of  $\text{N}_2$  measured at 77K at different activation temperatures.
- 12. Figure. S12** PXRD patterns for **1a**, **1b** and **1c** at low angles ( $2\theta = 5\text{--}25^\circ$ ).

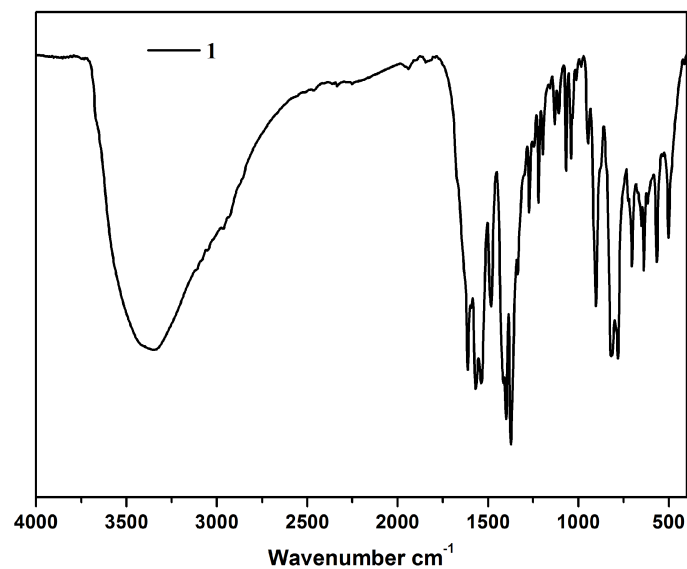

**Figure. S1** IR spectrum for  $\{[\text{Ni}(\text{dcpy})(\text{bipy})_{0.5}(\text{H}_2\text{O})] \cdot 1.5\text{H}_2\text{O}\}$  (**1**)

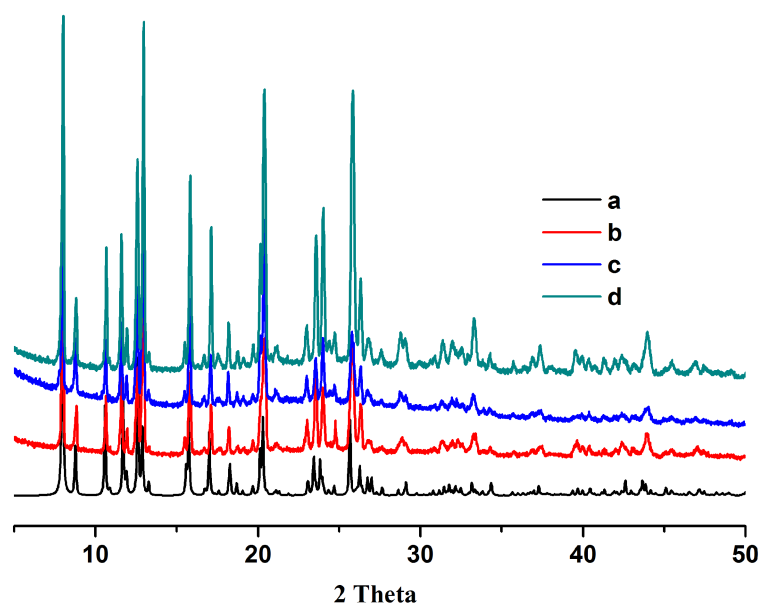

**Figure. S2** PXRD patterns for **1** obtained under different synthesis methods; a) simulated from the single crystal data; b) as-synthesized **1** via conventional solvothermal; c) as-synthesized **1** via conventional hydrothermal; d) as-synthesized **1** via rapid microwave method.

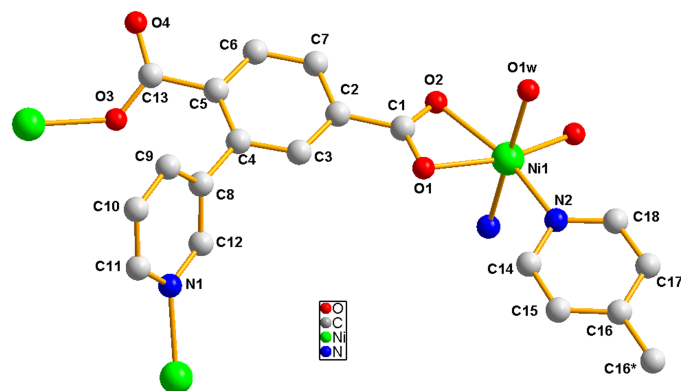

**Figure. S3** The ball-and-stick drawing of the asymmetric unit in **1**, the hydrogen atoms and solvent molecules are omitted, and the atoms in the asymmetric unit are labeled. Symmetry codes: \*:  $1/2-x, 1/2-y, -z$ .

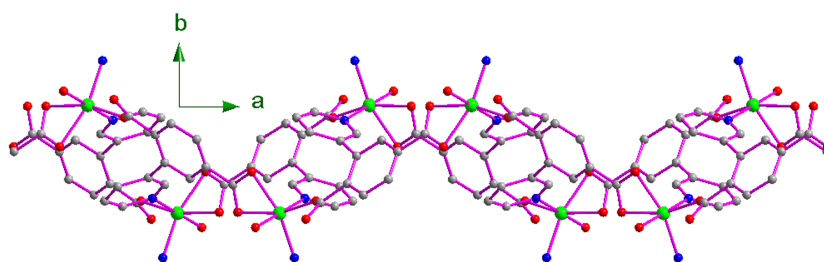

**Figure. S4** View of the 1D chain structure linked by  $\text{Ni}^{2+}$  centers and  $\text{dcpy}^{2-}$  ligands in **1** along the crystallographic  $c$ -axis.

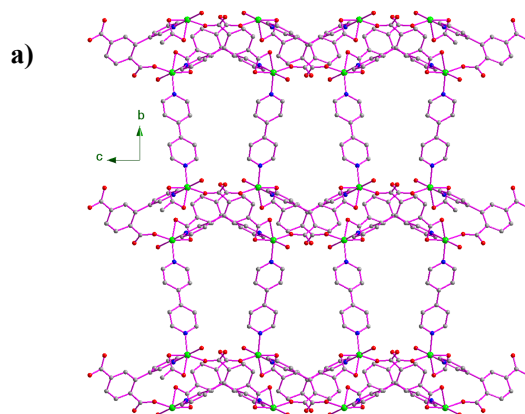

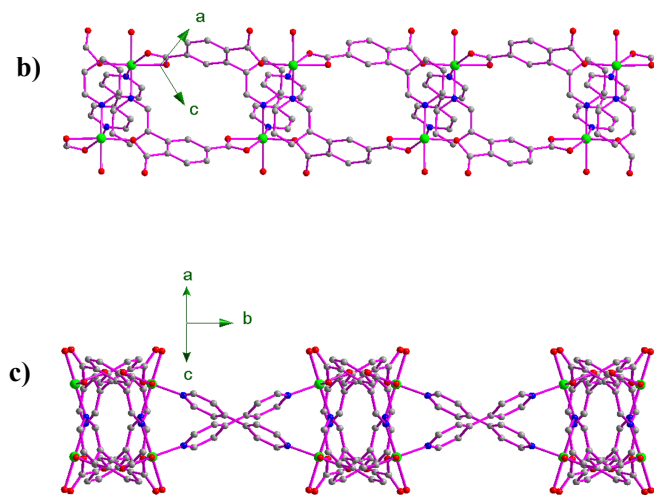

**Figure. S5** View of the 2D layer of **1**: a) along the crystallographic *a*-axis; b) along the crystallographic *b*-axis; c) along the crystallographic (101)-axis.

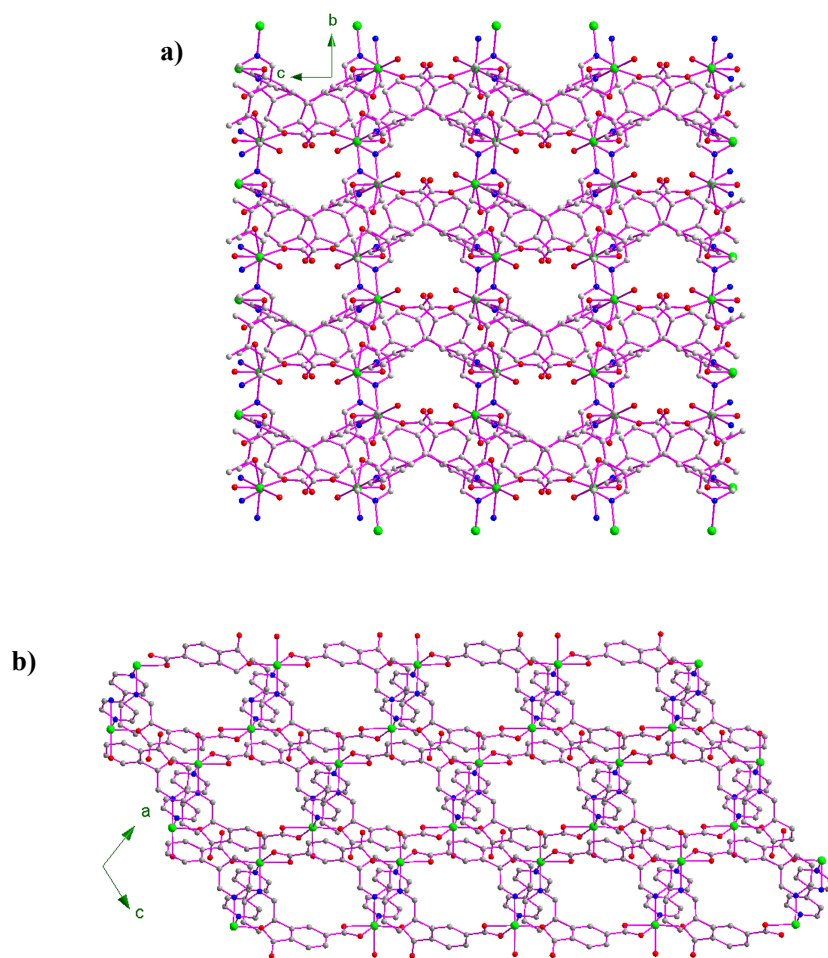

**Figure. S6** View of the 2D stacked layers of **1**: a) along the crystallographic *a*-axis; b) along the crystallographic *b*-axis.

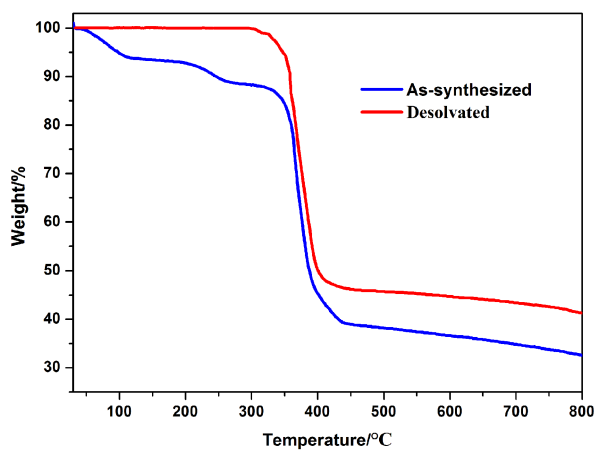

**Figure. S7** TGA plots of the as-synthesized and desolvated samples of **1**.

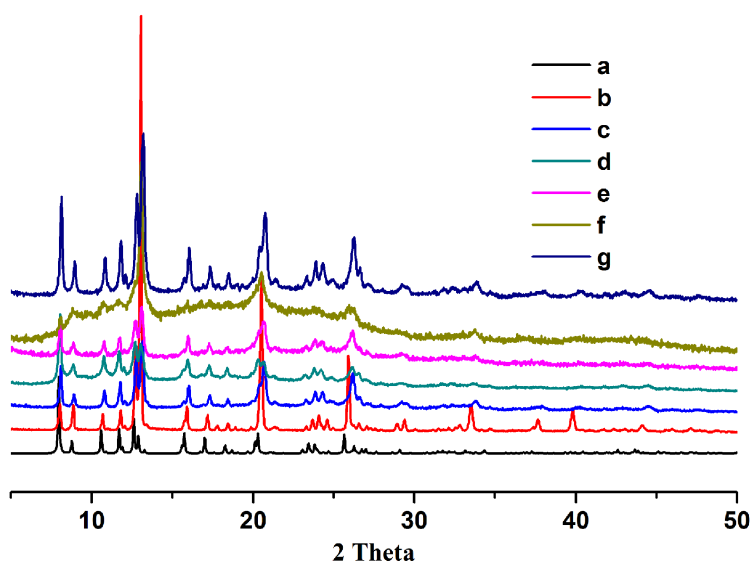

**Figure. S8** PXRD patterns for **1** in different state; a) simulated from the single crystal data; b) synthesized powder samples; c) dehydrated samples **1a**; d) dehydrated samples **1b**; e) dehydrated samples **1c**; f) dehydrated samples **1d**; g) rehydrated samples.

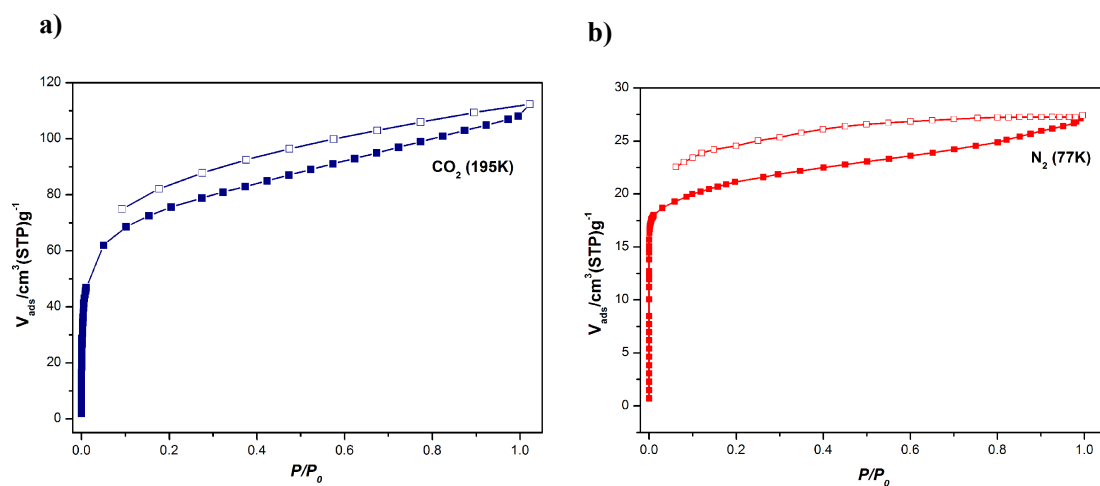

**Figure. S9** Sorption isotherms of CO<sub>2</sub> measured at 195 K a) and N<sub>2</sub> measured at 77 K b).

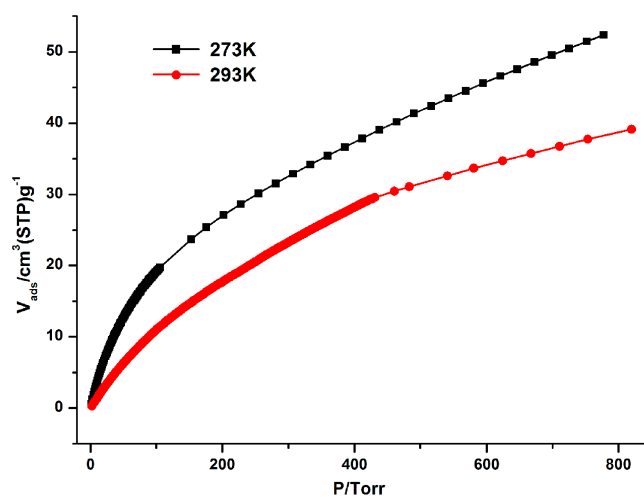

**Figure. S10** Sorption isotherms of CO<sub>2</sub> measured at 273 K and 293 K.

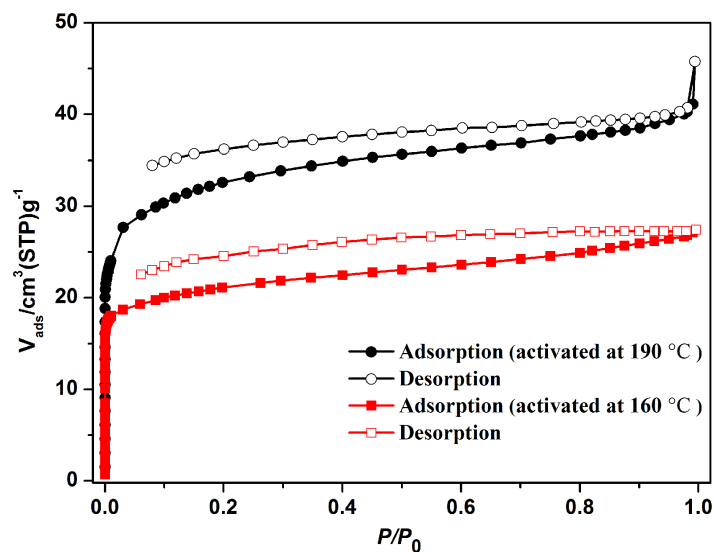

Figure. S11 Sorption isotherms of  $\text{N}_2$  measured at 77K at different activation temperatures.

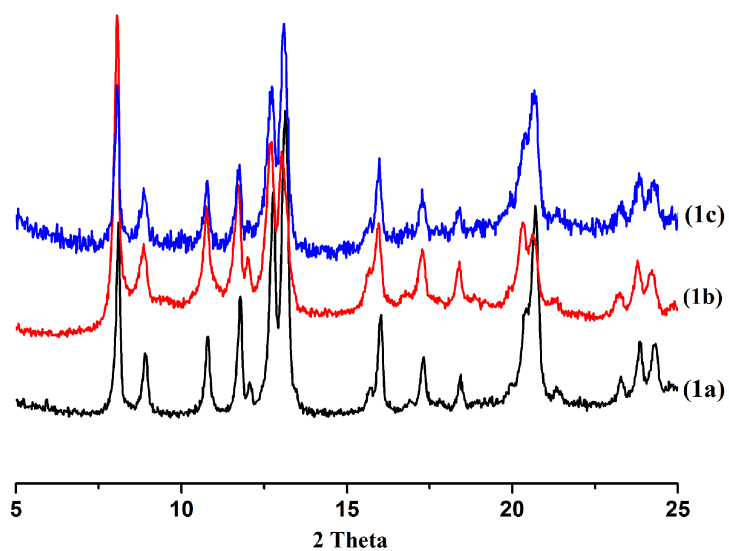

Figure. S12 PXRD patterns for **1a**, **1b** and **1c** at low angles ( $2\theta = 5\text{--}25^\circ$ ).
